# Supplementary material for: Transcriptome-Wide Detection of Intron/Exon Definition in the Endogenous Pre-mRNA Transcripts of Mammalian Cells and Its Regulation by Depolarization
Source: MDPI journal article supplement (doi:10.3390/ijms231710157), 2022-09-05
Supplement: s1 [file s1]

Supplementary Figure S1

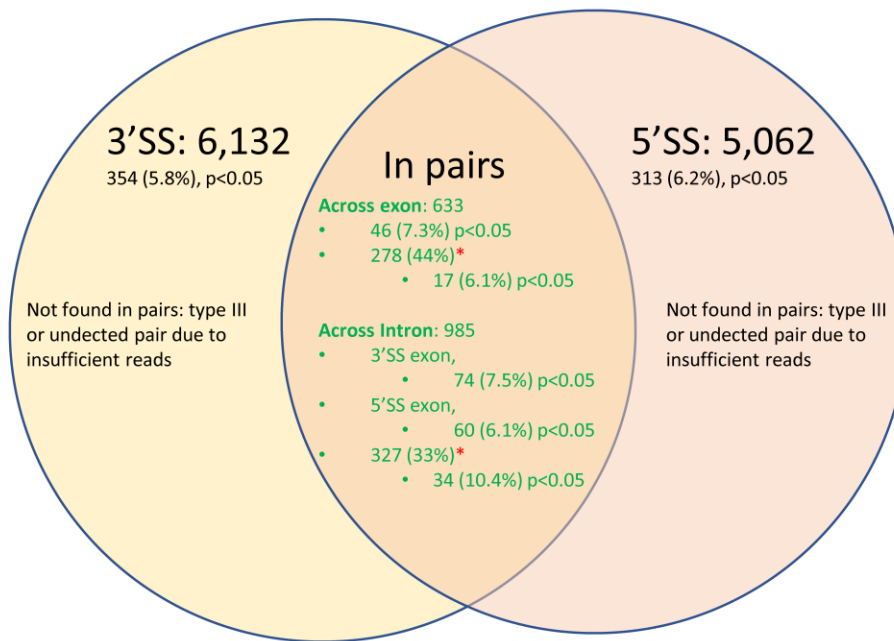

**Figure S1.** Distribution of RISE indexes obtained from the RNA-Seq data. p-values are from the DEXSeq for exon changes by KCl depolarization. \*: >20% change of the ratio of 5SS/3SS RISE index by KCl.

## Supplementary Figure S2

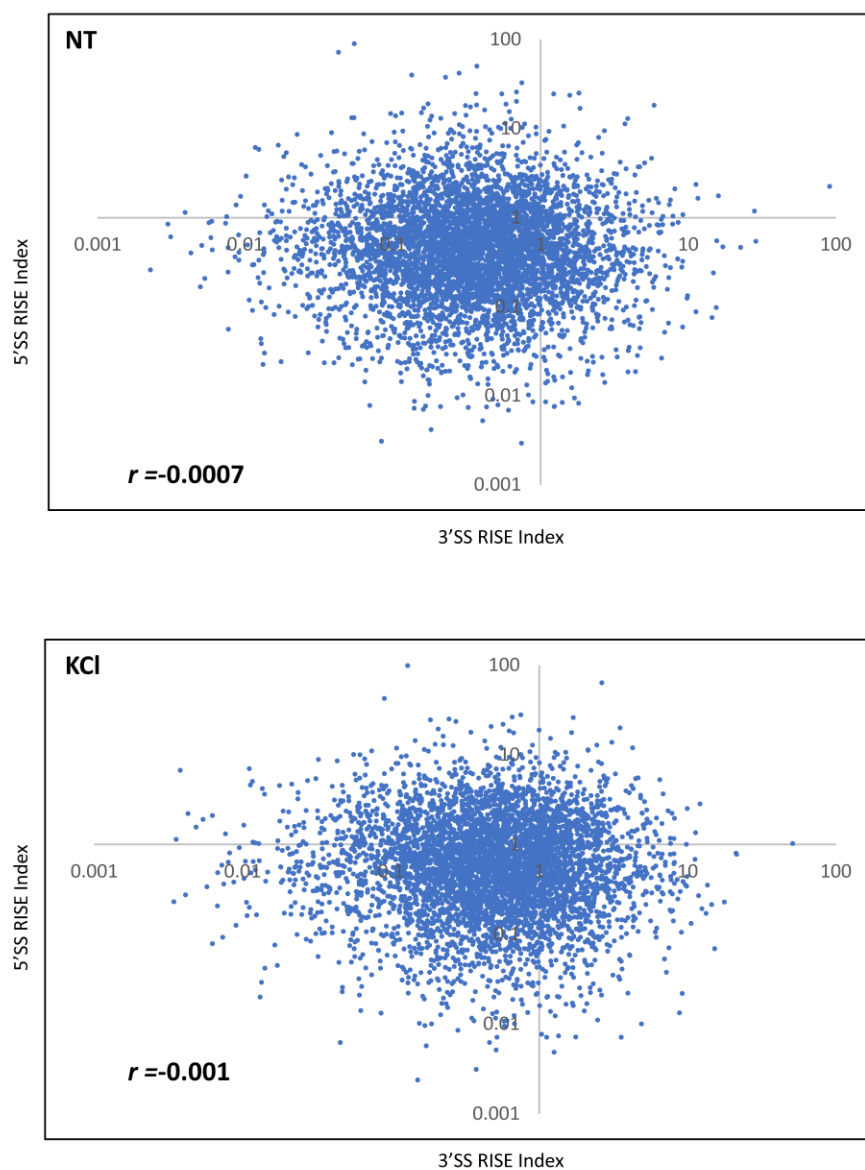

**Figure S2.** Distribution pattern of 5,062 RISE indexes of 5'SS and 3'SS unselected in pairs from the nuclear RNA-Seq data (see also Figure S1).
